# Supplementary material for: Iron supplementation regulates the progression of high fat diet induced obesity and hepatic steatosis via mitochondrial signaling pathways
Source: PubMed Central journal article supplement (PMC8144192; doi:10.1038/s41598-021-89673-8), 2021-05-24
Supplement: 41598_2021_89673_MOESM1_ESM.pdf [file 41598_2021_89673_MOESM1_ESM.pdf]

## Supplementary information

### **Iron supplementation regulates the progression of high fat diet induced obesity and hepatic steatosis via mitochondrial signaling pathways**

Naho Kitamura <sup>1,2</sup>, Yoko Yokoyama <sup>1,2</sup>, Hiroki Taoka <sup>1,2</sup>, Utana Nagano <sup>1,2</sup>, Shotaro Hosoda <sup>1,2</sup>, Tanon Taworntawat <sup>1,2</sup>, Anna Nakamura <sup>1,2</sup>, Yoko Ogawa <sup>3</sup>, Kazuo Tsubota <sup>2,3,\*</sup>, and Mitsuhiro Watanabe <sup>1,2,3,4,5,\*</sup>

<sup>1</sup> Systems Biology Program, Graduate School of Media and Governance, Keio University, 5322, Endo, Fujisawa, Kanagawa 252-0882, Japan

<sup>2</sup> Health Science Laboratory, Keio Research Institute at SFC, 5322, Endo, Fujisawa, Kanagawa 252-0882, Japan

<sup>3</sup> Department of Ophthalmology, Keio University School of Medicine, 35 Shinanomachi, Shinjuku-ku, Tokyo 160-8582, Japan

<sup>4</sup> Department of Environment and Information Studies, Keio University, 5322, Endo, Fujisawa, Kanagawa 252-0882, Japan

<sup>5</sup> Department of Internal Medicine, Keio University School of Medicine, 35 Shinanomachi, Shinjuku-ku, Tokyo 160-8582, Japan

**\*Corresponding Authors:**

Kazuo Tsubota:

Email: [tsubota@z3.keio.jp](mailto:tsubota@z3.keio.jp)

Phone: +81-3-6384-2866

Mitsuhiro Watanabe:

Email: [mitsuhiro.keio.hsl@gmail.com](mailto:mitsuhiro.keio.hsl@gmail.com)

Phone: +81-466-48-5099

ORCID

Naho Kitamura: <https://orcid.org/0000-0001-6894-3046>

Yoko Yokoyama: <https://orcid.org/0000-0002-4249-004X>

Kazuo Tsubota: <https://orcid.org/0000-0002-8874-7111>

Mitsuhiro Watanabe: <https://orcid.org/0000-0002-4500-780X>

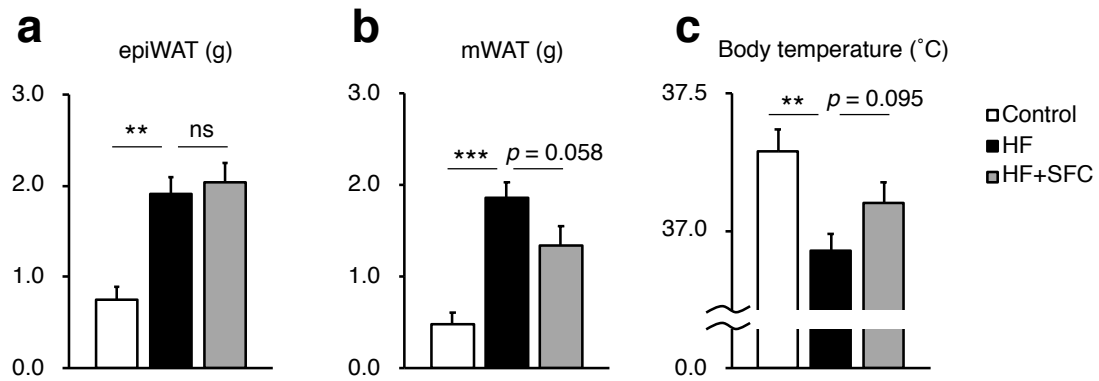

**Supplementary Figure S1.**

**a-c**, Male C57BL/6J mice of 6 weeks of age were fed with an open source control diet (Control; 10% kcal fat), a high-fat diet (HF; 60% kcal fat), or a high-fat diet supplemented with sodium ferrous citrate (HF+SFC) for 15 weeks.

**(a-b)** **(a)** Weight of epididymal WAT (epiWAT); and **(b)** mesenteric WAT (mWAT) ( $n = 5-6$ ).

**(c)** Rectal body temperature in mice fed 7 weeks with the different diets. ( $n = 11-12$ ).

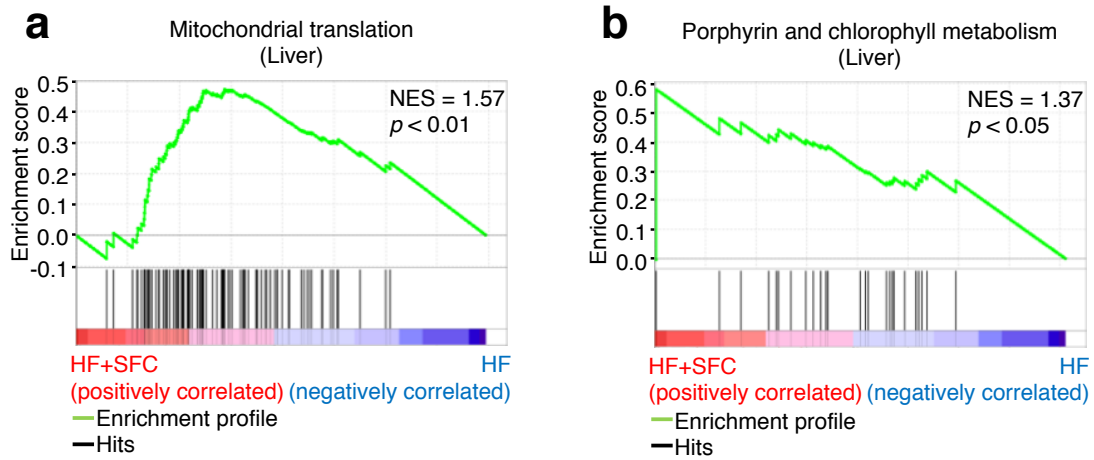

**Supplementary Figure S2.**

(a, b) Male C57BL/6J mice of 6 weeks of age were fed with each diet for 15 weeks as specified in Supplementary Figure S1. For each group, a mix of all sample cDNAs was used. Enrichment plots of genes upregulated in HF+SFC liver (compared to HF). (a) Reactome database; or (b) Kyoto Encyclopedia of Genes and Genomes (KEGG) database was used. Analysis was performed by Gene Set Enrichment Analysis (GSEA). NES: normalized enrichment score.

**Supplementary Table S1. The list of 51 upregulated mitochondrial genes in the liver and skeletal muscle of HF+SFC revealed in Figure 6a.**

| <b>Gene Symbol</b>   | <b>Description</b>                                          | <b>Entrez Gene ID</b> |
|----------------------|-------------------------------------------------------------|-----------------------|
| <i>1110001J03Rik</i> | RIKEN cDNA 1110001J03 gene                                  | 66117                 |
| <i>Abcb9</i>         | ATP-binding cassette, sub-family B (MDR/TAP), member 9      | 56325                 |
| <i>Abcd3</i>         | ATP-binding cassette, sub-family D (ALD), member 3          | 19299                 |
| <i>Acly</i>          | ATP citrate lyase                                           | 104112                |
| <i>Acsm2</i>         | acyl-CoA synthetase medium-chain family member 2            | 233799                |
| <i>Ak4</i>           | adenylate kinase 4                                          | 11639                 |
| <i>Akr1b10</i>       | aldo-keto reductase family 1, member B10 (aldose reductase) | 67861                 |
| <i>Aldh7a1</i>       | aldehyde dehydrogenase family 7, member A1                  | 110695                |
| <i>Apool</i>         | apolipoprotein O-like                                       | 68117                 |
| <i>Atp5sl</i>        | ATP5S-like                                                  | 66349                 |
| <i>Bola1</i>         | bolA-like 1 (E. coli)                                       | 69168                 |
| <i>Ccdc127</i>       | coiled-coil domain containing 127                           | 67433                 |
| <i>Cdc25c</i>        | cell division cycle 25C                                     | 12532                 |
| <i>Cep89</i>         | centrosomal protein 89                                      | 72140                 |
| <i>Coq10a</i>        | coenzyme Q10 homolog A (yeast)                              | 210582                |
| <i>Csl</i>           | citrate synthase like                                       | 71832                 |
| <i>Cyp24a1</i>       | cytochrome P450, family 24, subfamily a, polypeptide 1      | 13081                 |
| <i>Dnajc11</i>       | DnaJ (Hsp40) homolog, subfamily C, member 11                | 230935                |
| <i>Gbas</i>          | glioblastoma amplified sequence                             | 14467                 |
| <i>Grsfl</i>         | G-rich RNA sequence binding factor 1                        | 231413                |
| <i>Guf1</i>          | GUF1 GTPase homolog (S. cerevisiae)                         | 231279                |
| <i>Lipt1</i>         | lipoyltransferase 1                                         | 623661                |
| <i>Malsu1</i>        | mitochondrial assembly of ribosomal large subunit 1         | 75593                 |
| <i>Marchf5</i>       | membrane-associated ring finger (C3HC4) 5                   | 69104                 |
| <i>Mdh1</i>          | malate dehydrogenase 1, NAD (soluble)                       | 17449                 |

|                 |                                                                                              |        |
|-----------------|----------------------------------------------------------------------------------------------|--------|
| <i>Mrpl3</i>    | mitochondrial ribosomal protein L3                                                           | 94062  |
| <i>Mthfd2l</i>  | methylenetetrahydrofolate dehydrogenase (NADP+ dependent) 2-like                             | 665563 |
| <i>Mto1</i>     | mitochondrial translation optimization 1 homolog (S. cerevisiae)                             | 68291  |
| <i>Mutyh</i>    | mutY homolog (E. coli)                                                                       | 70603  |
| <i>Ndor1</i>    | NADPH dependent diflavin oxidoreductase 1                                                    | 78797  |
| <i>Ndufb2</i>   | NADH dehydrogenase (ubiquinone) 1 beta subcomplex, 2                                         | 68198  |
| <i>Ndufb9</i>   | NADH dehydrogenase (ubiquinone) 1 beta subcomplex, 9                                         | 66218  |
| <i>Oxsm</i>     | 3-oxoacyl-ACP synthase, mitochondrial                                                        | 71147  |
| <i>Pak7</i>     | p21 protein (Cdc42/Rac)-activated kinase 7                                                   | 241656 |
| <i>Pick1</i>    | protein interacting with C kinase 1                                                          | 18693  |
| <i>Pif1</i>     | PIF1 5'-to-3' DNA helicase homolog (S. cerevisiae)                                           | 208084 |
| <i>Ppox</i>     | protoporphyrinogen oxidase                                                                   | 19044  |
| <i>Rmdn1</i>    | regulator of microtubule dynamics 1                                                          | 66302  |
| <i>Rps18</i>    | ribosomal protein S18                                                                        | 20084  |
| <i>Rsad1</i>    | radical S-adenosyl methionine domain containing 1                                            | 237926 |
| <i>Sdha</i>     | succinate dehydrogenase complex, subunit A, flavoprotein (Fp)                                | 66945  |
| <i>Sirt5</i>    | sirtuin 5                                                                                    | 68346  |
| <i>Slc25a14</i> | solute carrier family 25 (mitochondrial carrier, brain), member 14                           | 20523  |
| <i>Slc25a31</i> | solute carrier family 25 (mitochondrial carrier; adenine nucleotide translocator), member 31 | 73333  |
| <i>Slc25a48</i> | solute carrier family 25, member 48                                                          | 328258 |
| <i>Slc25a54</i> | solute carrier family 25, member 54                                                          | 74686  |
| <i>Slmo1</i>    | slowmo homolog 1 (Drosophila)                                                                | 225655 |
| <i>Star</i>     | steroidogenic acute regulatory protein                                                       | 20845  |
| <i>Sucla2</i>   | succinate-Coenzyme A ligase, ADP-forming, beta subunit                                       | 20916  |
| <i>Tufm</i>     | Tu translation elongation factor, mitochondrial                                              | 233870 |
| <i>Uqcrcq</i>   | ubiquinol-cytochrome c reductase, complex III subunit VII                                    | 22272  |

**Supplementary Table S2. The composition of diets the control, high-fat (HF), and iron supplemented HF (HF+SFC) diets used in this study.**

|                                       | Control (D12450B) |       | HF (D12492) |       | HF (D12492) + SFC |       |
|---------------------------------------|-------------------|-------|-------------|-------|-------------------|-------|
|                                       | gm%               | kcal% | gm%         | kcal% | gm%               | kcal% |
| Protein                               | 19.2              | 20    | 26          | 20    | 26                | 20    |
| Carbohydrate                          | 67.3              | 70    | 26          | 20    | 26                | 20    |
| Fat                                   | 4.3               | 10    | 35          | 60    | 35                | 60    |
| Total                                 |                   | 100   |             | 100   |                   | 100   |
| kcal/gm                               | 3.85              |       | 5.24        |       | 5.24              |       |
| Ingredient                            | gm                | kcal  | gm          | kcal  | gm                | kcal  |
| Casein                                | 200               | 800   | 200         | 800   | 200               | 800   |
| L-Cystine                             | 3                 | 12    | 3           | 12    | 3                 | 12    |
| Corn Starch                           | 315               | 1260  | 0           | 0     | 0                 | 0     |
| Maltodextrin                          | 35                | 140   | 125         | 500   | 125               | 500   |
| Sucrose                               | 350               | 1400  | 68.8        | 275   | 68.8              | 275   |
| Cellulose                             | 50                | 0     | 50          | 0     | 50                | 0     |
| Soybean Oil                           | 25                | 225   | 25          | 225   | 25                | 225   |
| Lard                                  | 20                | 180   | 245         | 2205  | 245               | 2205  |
| Mineral Mix S10026                    | 10                | 0     | 10          | 0     | 10                | 0     |
| DiCalcium Phosphate                   | 13                | 0     | 13          | 0     | 13                | 0     |
| Calcium Carbonate                     | 5.5               | 0     | 5.5         | 0     | 5.5               | 0     |
| Potassium Citrate, 1 H <sub>2</sub> O | 16.5              | 0     | 16.5        | 0     | 16.5              | 0     |
| Vitamin Mix V10001                    | 10                | 40    | 10          | 40    | 10                | 40    |
| Choline Bitartrate                    | 2                 | 0     | 2           | 0     | 2                 | 0     |
| FD&C Yellow Dye #5                    | 0.05              | 0     | 0           | 0     | 0                 | 0     |
| FD&C Blue Dye #1                      | 0                 | 0     | 0.05        | 0     | 0.05              | 0     |
| Sodium Ferrous Citrate                | 0                 | 0     | 0           | 0     | 0.18              | 0     |
| Total                                 | 1055.05           | 4057  | 773.85      | 4057  | 774.03            | 4057  |

**Supplementary Table S3. Composition of micronutrients present in 4057 kcal of diets.**

|                       | <b>Control (D12450B)</b> | <b>HF (D12492)</b> | <b>HF (D12492) +SFC</b> |
|-----------------------|--------------------------|--------------------|-------------------------|
| <b>Minerals (mg)</b>  |                          |                    |                         |
| Fe                    | 37                       | 37                 | 56                      |
| Mo                    | 1.6                      | 1.6                | 1.6                     |
| Cr                    | 2.0                      | 2.0                | 2.0                     |
| Cu                    | 6.0                      | 6.0                | 6.0                     |
| Mn                    | 59                       | 59                 | 59                      |
| I                     | 0.2                      | 0.2                | 0.2                     |
| Fl                    | 0.9                      | 0.9                | 0.9                     |
| Se                    | 0.16                     | 0.16               | 0.16                    |
| Zn                    | 29                       | 29                 | 29                      |
| <b>Minerals (g)</b>   |                          |                    |                         |
| Na                    | 1.0                      | 1.0                | 1.0                     |
| Cl                    | 1.6                      | 1.6                | 1.6                     |
| Mg                    | 0.5                      | 0.5                | 0.5                     |
| S                     | 0.33                     | 0.33               | 0.33                    |
| <b>Vitamins</b>       |                          |                    |                         |
| Vit A (IU)            | 4000                     | 4000               | 4000                    |
| Vit D3 (IU)           | 1000                     | 1000               | 1000                    |
| Vit E (IU)            | 50                       | 50                 | 50                      |
| Menadione (mg)        | 0.5                      | 0.5                | 0.5                     |
| Biotin (mg)           | 0.2                      | 0.2                | 0.2                     |
| Vit B12 (µg)          | 10                       | 10                 | 10                      |
| Folic Acid (mg)       | 2                        | 2                  | 2                       |
| Niacin (mg)           | 30                       | 30                 | 30                      |
| Pantothenic Acid (mg) | 16                       | 16                 | 16                      |
| Vit B6 (mg)           | 7                        | 7                  | 7                       |
| Vit B2 (mg)           | 6                        | 6                  | 6                       |
| Vit B1 (mg)           | 6                        | 6                  | 6                       |



**Supplementary Table S4. Primer sequences for qRT-PCR analysis.**

| <b>Gene</b>    | <b>Forward Primer (5'→3')</b> | <b>Reverse Primer (5'→3')</b> |
|----------------|-------------------------------|-------------------------------|
| <i>Abcb7</i>   | TGCAGTTACACGGTGGAGAA          | CAAAATTCAGCATTGCCAGA          |
| <i>Acox1</i>   | TTCTACCAATCTGGCTGCAC          | GTGGGTGGTATGGTGTCGTA          |
| <i>Acsf3</i>   | GCGAGAAGGATTCCAAGACTGG        | GAAGAGTAGCCGATTTCGGCATC       |
| <i>Actb</i>    | CATCCGTAAAGACCTCTATGCCAAC     | ATGGAGCCACCGATCCACA           |
| <i>Atp5o</i>   | AGGCCCTTTGCCAAGCTT            | TTCTCCTTAGATGCAGCAGAGTACA     |
| <i>B2m</i>     | TGCTACTCGGCGCTTCAGTC          | AGGCGGGTGGAACTGTGTTAC         |
| <i>Bola3</i>   | CCTCGAGCCACAGCTATTCA          | CGTGCATGCCCTTGATCTCT          |
| <i>Coq10a</i>  | CAAGCGAAAGGCTTACTCGGAG        | CCAGTGACTTCTTACACCACGG        |
| <i>Cox10</i>   | TTCCTGCTTACATCCCTTGG          | TTCATGTTTGAGTCGAACGG          |
| <i>Cox6b1</i>  | ATGTCTCCGTGTGTGAGTGG          | GATCTTCCCAGGAAATGTGC          |
| <i>Cpt1a</i>   | TGGGCTACTCAGAGGATGG           | AAGGTGTCAAATGGGAAGG           |
| <i>Cpt1b</i>   | GGATGTTTCGAGATGCACAGC         | GGAAGCTGTAGAGCATGGGCCG        |
| <i>Cycl</i>    | GCTTCCAGGTGCAAGTGCT           | CAGACTTCGAGGACAAGGACA         |
| <i>Cyts</i>    | GCAAGCATAAGACTGGACCAAA        | TTGTTGGCATCTGTGTAAGAGAATC     |
| <i>Echs1</i>   | AGCCTGTAGCTCACTGTTGTC         | ATGTAAGTAAAGTTAGCACCCG        |
| <i>Fastkd2</i> | ATGAATAGCAAAGCACGTTCT         | TAGCCGATGGTTTCTTGGGTT         |
| <i>Hadh</i>    | TTCCAGAGGCTGGACAAGTTCG        | GCCAGCAAATCGGTCTTGTCTG        |
| <i>Hamp1</i>   | CCTATCTCCATCAACAGAT           | TGCAACAGATAACCACACTG          |
| <i>Hmbs</i>    | ACTCTGCTTCGCTGCATTG           | AGTTGCCCATCTTTCATCACTG        |
| <i>Isca2</i>   | GGCCTTGTCCCTAACTGCC           | TGACCCTTCGGTGATTTCAG          |
| <i>Lcad</i>    | ACGATCTGTCTTTCGATCAG          | ACATGTGGGAGTACCCGATT          |
| <i>Mcad</i>    | AGGGTTTAGTTTTGAGTTGACGG       | CCCCGCTTTTGTCAATATCCG         |
| <i>Mlycd</i>   | CTGAGGATCTGCTCGGAAGCTTTG      | TGGATGGCTGACAGCAGCCTCAA       |
| <i>mt-Col</i>  | ACACAACCTTCTTTGATCCCG         | AGAATCAGAACAGATGCTGG          |
| <i>mt-Cyb</i>  | CCATTCTACGCTCAATCCCCA         | AGGCTTCGTTGCTTTGAGGTA         |
| <i>Ndufa1</i>  | GTCCACTGCGTACATCCACA          | ATCGCGTTCATCAGATACC           |
| <i>Nrf1</i>    | TCGGAGCACTTACTGGAGTC          | CTGGTACATGCTCACAGGGA          |
| <i>Pgcl1a</i>  | AAGGGCCAAACAGAGAGAGA          | GCGTTGTGTCAGGTCTGATT          |
| <i>Pgcl1b</i>  | AGATGAAGATCCAAGCTGCCACA       | TCCTCCTCCATTGGCTTGTATGGA      |

|                |                          |                          |
|----------------|--------------------------|--------------------------|
| <i>Sdhc</i>    | AGTTTGTGCTTGTCTTCCCG     | CACTCCAGACAGCCAGACCT     |
| <i>Sdhd</i>    | CATGGCGGTTCTCTTAAAGC     | TGACACATAAGCGGGTCTGA     |
| <i>Tfam</i>    | ATGTCTCCGGATCGTTTCAC     | CCAAAAAGACCTCGTTCAGC     |
| <i>Ucp3</i>    | CTCTGCACTGTATGCTGAAGATG  | CACGTTCCAAGCTCCCAGA      |
| <i>Uqcrfs1</i> | ATGTGAAGCGACCCTTCCT      | GGAAAAACGGACAGAAGCAG     |
| <i>Vlcad</i>   | GGCCAAGCTGGTGAAACACAAGAA | ACAGAACCACCACCATGGCATAGA |
